# Supplementary material
Source: PubMed Central journal article supplement (PMC2643500)
Supplement: supp_284_8_4921__1.pdf [file supp_284_8_4921__1.pdf]

## Christine M. Gould

---

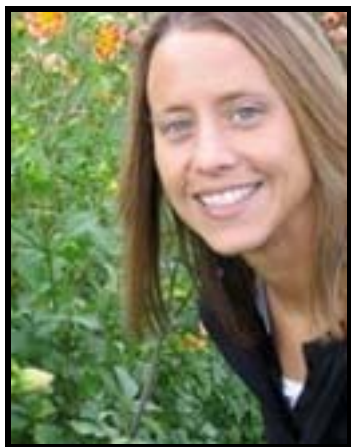

**Current Position:** Graduate student in the Laboratory of Alexandra Newton in the Pharmacology Department at the University of California, San Diego in La Jolla, California

**Education:** B.S. in Biology (2002) from Truman State University in Kirksville, Missouri

**Non-scientific Interests:** Triathlon, travel

I joined the Biomedical Sciences Graduate Program in 2002 where I rotated in several labs in the Pharmacology Department. During my final rotation in the laboratory of Alexandra Newton, I became interested in understanding the mechanisms that regulate the maturation and down-regulation of protein kinase C. In the fall of 2007, I began a collaboration with Natarajan Kannan, a scientist in the laboratory of Susan Taylor, who was using systems biology approaches in order to understand how the AGC family of serine/threonine kinases, of which PKC is a member, diverged from other kinase families. He identified a conserved motif in the C-terminal tail of AGC kinases, the PXXP motif; and I used molecular and biochemical approaches (such as mutagenesis, *in vitro* kinase assays, and pulse-chase studies) to understand how this motif affected PKC maturation and proper catalytic function. I anticipate defending my thesis in early 2009.

---

**Read Christine Gould's article entitled:** The Chaperones Hsp90 AND Cdc37 Mediate the Maturation and Stabilization of Protein Kinase C through a Conserved PXXP Motif in the C-terminal Tail

<http://www.jbc.org/cgi/content/full/284/8/4921>
